# Supplementary material
Source: PubMed Central journal article supplement (PMC3545791)
Supplement: 1211431109_pnas.201211431SI.pdf [file 1211431109_pnas.201211431SI.pdf]

# Supporting Information

Lai et al. 10.1073/pnas.1211431109

## SI Methods

**Animals.** Dystrophin-deficient mdx mice were purchased from The Jackson Laboratory. Utrophin heterozygous mdx mice (*mdx/utro*<sup>+/-</sup>) were originally provided by Mark Grady (Washington University, St. Louis, MO) (1). Experimental utrophin/dystrophin double knockout (u-dko) mice were generated by crossing *mdx/utro*<sup>+/-</sup> mice, as previously described (2). The skeletal muscle specific mini- and microdystrophin transgenic mdx mice were published previously (3, 4). In these transgenic mice, the mini- or microdystrophin genes were expressed under the transcriptional regulation of the human skeletal  $\alpha$ -actin promoter. Three transgenic strains were used in the study. The  $\Delta$ H2-R19 minidystrophin transgenic mdx mice were used to determine in vivo neuronal NOS (nNOS) binding by the stripped-down R16/17 construct (Fig. 1). This minigene carries the C-terminal domain but does not contain dystrophin R16/17. The  $\Delta$ R4-23/ $\Delta$ C and the  $\Delta$ R2-R15/ $\Delta$ R18-R23/ $\Delta$ C microgene transgenic mdx mice were used as negative and positive controls, respectively, for nNOS binding in muscle (Fig. S3B). Dystrophin R16/17 is present in the  $\Delta$ R2-R15/ $\Delta$ R18-R23/ $\Delta$ C microgene but not in the  $\Delta$ R4-23/ $\Delta$ C microgene. Experimental mice were housed in a specific pathogen-free animal facility.

**Microdystrophins and Microutrophins.** A total of 48 different microdystrophin and microutrophin constructs were used for in vivo nNOS binding assay (Table S1). A total of five different microdystrophin constructs were evaluated in vitro for their nNOS binding activity by yeast two-hybrid assay. These microgenes were generated using PCR-based cloning method and all were confirmed by DNA sequencing (Table S1). Microgene expression was regulated by the CMV promoter and SV40 polyadenylation signal. For microdystrophin cloning, a previously published human  $\Delta$ R2-R15/ $\Delta$ R18-R23/ $\Delta$ C microgene was used as the backbone (3). All dystrophin-related modifications were made according to the human dystrophin sequence. The microutrophin genes were cloned using the full-length mouse utrophin cDNA as the template (a gift of James Ervasti, University of Minnesota, Minneapolis, MN) (5). All utrophin-related modifications were made according to the mouse utrophin sequence.

**Recombinant Adeno-Associated Virus Vector and in Vivo Gene Transfer.** The microgene expression cassette was cloned between two inverted terminal repeats in a *cis* AAV packaging plasmid (6). All experimental adeno-associated virus (AAV) vectors were pseudotyped using the Y445F AAV-6 tyrosine mutant capsid (a gift of Arun Srivastava, University of Florida, Gainesville, FL) (7, 8). AAV vectors were purified through two rounds of CsCl gradient ultracentrifugation and the viral titer was determined by quantitative PCR according to our published protocol (6). To test in vivo nNOS binding activity,  $1 \times 10^{10}$  vector genome (vg) particles of AAV vectors were directly injected into the tibialis anterior (TA) muscle of 2- to 6-mo-old mdx or transgenic mdx mice, or 3-wk-old u-dko mice (9).

**Immunofluorescence Staining and nNOS Activity Staining.** Freshly collected muscle samples were embedded in Tissue-Tek OCT (Sakura Finetek) and snap-frozen in 2-methylbutane with liquid nitrogen. GFP was visualized under the FITC channel using a Nikon

E800 fluorescence microscope. Human dystrophin derived microdystrophin was detected with Dys-3, a human dystrophin-specific monoclonal antibody (1:20; Novocastra). This antibody recognizes an epitope in human dystrophin hinge 1. Dystrophin spectrin-like repeats 16 and 17 were detected with Mandys 102 (1:20) and Manex 44A (1:300) monoclonal antibodies, respectively (gifts from Glenn Morris, The Robert Jones and Agnes Hunt Orthopedic Hospital, Oswestry, Shropshire, United Kingdom) (3, 10). Utrophin was revealed with a mouse monoclonal antibody against the utrophin N-terminal domain (1:20; Vector Laboratories). nNOS was detected with a rabbit polyclonal antibody against an epitope near the C-terminal end of nNOS (1:2,000; Santa Cruz). Histochemical evaluation of nNOS activity was performed according to our published protocol (3, 4, 11, 12). This staining revealed the NADPH diaphorase activity of nNOS. The Flag tag was revealed with the monoclonal anti-FLAG M2 antibody (1:1,00; Sigma). Photomicrographs were taken with a Qimage Retiga 1300 camera using a Nikon E800 fluorescence microscope.

**Western Blot.** Whole-muscle lysate and membrane-enriched mitochondrial preparations were obtained from snap-frozen TA muscles according to our previously published protocols (3, 4, 11–13).  $\Delta$ H2-R19 minidystrophin was detected with an antibody against the C-terminal domain of dystrophin (Dys-2, 1:100; Novocastra). Microdystrophins (including  $\Delta$ R4-R23/ $\Delta$ C,  $\Delta$ R2-R15/ $\Delta$ R18-R23/ $\Delta$ C,  $\mu$ -Dys+Utro R15 and  $\mu$ -Dys+Utro R16) were probed with the Dys-B antibody that reacts with dystrophin R1 (1:100; Novocastra, Leica Microsystems). Mandys 102 (1:20) and Manex 44A (1:500) monoclonal antibodies were used to detect dystrophin R16 and R17, respectively. nNOS was detected with a rabbit polyclonal antibody against the N-terminal end of nNOS (1:4,000; Upstate, Millipore).  $\alpha$ -Tubulin (1:3,000; Sigma) was used as the loading control for whole-muscle lysate Western blot.  $\alpha$ 1-Na<sup>+</sup>/K<sup>+</sup> ATPase (1:400; Upstate, Millipore) was used as the loading control for mitochondrial preparation Western blot.

**Yeast Two-Hybrid.** Yeast two-hybrid assay was performed with the Matchmaker GAL4 Two-Hybrid System 3 (Clontech) as described previously (3). The nNOS PDZ domain [a gift of David Bredt (University of California, San Francisco, CA) and Samie R. Jaffrey (Cornell University Weill Medical College, New York, NY)] was cloned into the binding construct (3, 14). The activation constructs contain the  $\alpha$ -helix-modified dystrophin R16/17 in which individual helix within R16/17 was replaced by the corresponding helix from dystrophin R18. A total of five different activation constructs were generated. In each construct, one of the following dystrophin helices including R16 $\alpha$ 1, R16 $\alpha$ 2, R16 $\alpha$ 3, R17 $\alpha$ 1, or R17 $\alpha$ 2 was replaced. All constructs were sequenced before use. The positive control for the yeast two-hybrid assay was performed using the syntrophin PDZ domain as the activation construct according to our previous publication (3). To detect positive interaction, the binding construct and one of the referred activation construct were cotransfected to yeast cells. The qualitative plate assay and the semiquantitative dot assay were performed on the leucine/tryptophan/histidine triple-deficient medium. The quantitative  $\beta$ -galactosidase activity assay was measured using the Galacto-light system (Applied Biosystems).

1. Grady RM, et al. (1997) Skeletal and cardiac myopathies in mice lacking utrophin and dystrophin: A model for Duchenne muscular dystrophy. *Cell* 90(4):729–738.  
2. Yue Y, Liu M, Duan D (2006) C-terminal-truncated microdystrophin recruits dystrobrevin and syntrophin to the dystrophin-associated glycoprotein complex and reduces muscular dystrophy in symptomatic utrophin/dystrophin double-knockout mice. *Mol Ther* 14(1):79–87.

3. Lai Y, et al. (2009) Dystrophins carrying spectrin-like repeats 16 and 17 anchor nNOS to the sarcolemma and enhance exercise performance in a mouse model of muscular dystrophy. *J Clin Invest* 119(3):624–635.  
4. Li D, Yue Y, Lai Y, Hakim CH, Duan D (2011) Nitrosative stress elicited by nNOS $\beta$  delocalization inhibits muscle force in dystrophin-null mice. *J Pathol* 223(1):88–98.



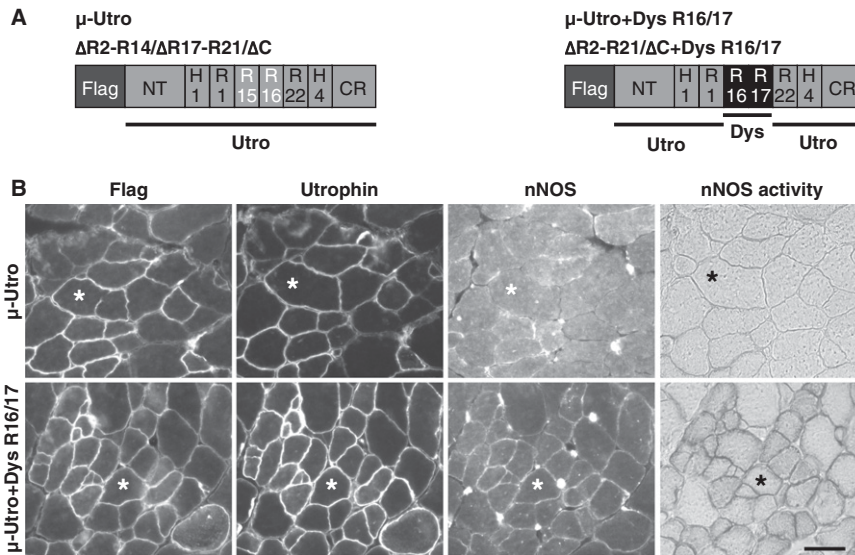

**Fig. S2.** Dystrophin R16/17 restores sarcolemmal nNOS expression in the context of microutrophin. (A) Schematic outline of the  $\Delta R2-14/\Delta R17-21/\Delta C$  microutrophin gene (Left,  $\mu$ -Utro) and the chimeric  $\Delta R2-R21/\Delta C+Dys R16/17$  microutrophin gene (Right,  $\mu$ -Utro+Dys R16/17). Utrophin R15/16 (highlighted in white) share homology with dystrophin R16/17. In the chimeric microutrophin gene, utrophin R15/16 was replaced by dystrophin R16/17. A flag tag was engineered at the N-terminal end of the microutrophin constructs to facilitate detection. (B) AAV viruses expressing the parental or the chimeric microutrophin genes were delivered to the anterior tibialis muscle of utrophin/dystrophin double knockout mice. Representative images of flag, utrophin, and nNOS immunofluorescence staining and nNOS activity staining. (Upper)  $\Delta R2-14/\Delta R17-21/\Delta C$  microutrophin AAV infected; (Lower)  $\Delta R2-R21/\Delta C+Dys R16/17$  chimeric microutrophin AAV infected. Asterisks indicate the same myofiber in the serial sections. (Scale bar, 50  $\mu$ m.)





**Table S1. Summary of microdystrophin and microtrophin constructs used in the study**

| Construct name                                                   | Configuration                                                                                                           | Lab log no. | Source   |
|------------------------------------------------------------------|-------------------------------------------------------------------------------------------------------------------------|-------------|----------|
| <b>Microdystrophin</b>                                           |                                                                                                                         |             |          |
| $\Delta$ R2-R15/ $\Delta$ R18-R23/ $\Delta$ C                    | NT, H1, R1, R16, R17, R24, H4, CR                                                                                       | YL90        | Fig. S1  |
| NT.R16/17.CR.GFP                                                 | NT, H1, R16, R17, H4, CR, GFP                                                                                           | YL228       | Fig. S1  |
| R16/17.CR.GFP                                                    | R16, R17, H4, CR, GFP                                                                                                   | YL230       | Fig. S1  |
| NT.R16/17.GFP                                                    | NT, H1, R16, R17, GFP                                                                                                   | YL229       | Fig. S1  |
| R16/17.GFP                                                       | R16, R17, GFP                                                                                                           | YL231       | Fig. 1   |
| R16/17.GFP.Pal                                                   | R16, R17, GFP, Pal                                                                                                      | YL299       | Fig. 1   |
| <b>Microtrophin and repeat-modified microtrophin</b>             |                                                                                                                         |             |          |
| $\mu$ -Utro ( $\Delta$ R2-R14/ $\Delta$ R17-R21/ $\Delta$ C)     | Flag, Utro(NT, H1, R1, R15, R16, R22, H4, CR)                                                                           | YL239       | Fig. S2  |
| $\mu$ -Utro+Dys R16/17 ( $\Delta$ R2-R21/ $\Delta$ C+Dys R16/17) | Flag, Utro(NT, H1, R1), Dys R16, Dys R17, Utro(R22, H4, CR)                                                             | YL223       | Fig. S2  |
| <b>Microdomain-modified microdystrophin</b>                      |                                                                                                                         |             |          |
| Construct I                                                      | NT, H1, R1, R16(Utro microdomain VYKDF5F), R17, R24, H4, CR                                                             | YL278       | Fig. 2   |
| Construct II                                                     | NT, H1, R1, R16(Utro microdomain DRLGEQ), R17, R24, H4, CR                                                              | YL279       | Fig. 2   |
| Construct III                                                    | NT, H1, R1, R16(Utro microdomain IAVVHEK), R17, R24, H4, CR                                                             | YL280       | Fig. 2   |
| Construct IV                                                     | NT, H1, R1, R16(Utro microdomain QPDVIVE), R17, R24, H4, CR                                                             | YL281       | Fig. 2   |
| Construct V                                                      | NT, H1, R1, R16(Utro microdomain SGPEAIQIRD), R17, R24, H4, CR                                                          | YL282       | Fig. 2   |
| Construct VI                                                     | NT, H1, R1, R16(Utro microdomain MLAQLNAKW), R17, R24, H4, CR                                                           | YL283       | Fig. 2   |
| Construct VII                                                    | NT, H1, R1, R16(Utro microdomain DRVNRVYS), R17, R24, H4, CR                                                            | YL284       | Fig. 2   |
| Construct VIII                                                   | NT, H1, R1, R16(Utro microdomain DRRGS), R17, R24, H4, CR                                                               | YL285       | Fig. 2   |
| Construct IX                                                     | NT, H1, R1, R16, R17(Utro microdomain QFHDLDDL), R24, H4, CR                                                            | YL286       | Fig. 2   |
| Construct X                                                      | NT, H1, R1, R16, R17(Utro microdomain DLLVDTC), R24, H4, CR                                                             | YL287       | Fig. 2   |
| Construct XI                                                     | NT, H1, R1, R16, R17(Utro microdomain DGSLDLEKARA), R24, H4, CR                                                         | YL288       | Fig. 2   |
| Construct XII                                                    | NT, H1, R1, R16, R17(Utro microdomain QQLELEE), R24, H4, CR                                                             | YL289       | Fig. 2   |
| Construct XIII                                                   | NT, H1, R1, R16, R17(Utro microdomain SSHQPSLI), R24, H4, CR                                                            | YL290       | Fig. 2   |
| Construct XIV                                                    | NT, H1, R1, R16, R17(Utro microdomain KVNKGED), R24, H4, CR                                                             | YL291       | Fig. 2   |
| <b>Microdomain-modified microtrophin</b>                         |                                                                                                                         |             |          |
| $\mu$ -Utro+Dys R17 microdomain IX                               | Flag, Utro (NT, H1, R1, R15, R16(Dys R17 microdomain IX), R22, H4, CR)                                                  | YL325       | Fig. 3   |
| <b>Linker region-modified microdystrophin</b>                    |                                                                                                                         |             |          |
| Mutant-1                                                         | NT, H1, R1, R16(Utro R15 3'-linker sequence), R17, R24, H4, CR                                                          | YL312       | Table S2 |
| Mutant-2                                                         | NT, H1, R1, R16(Dys R15 3'-linker sequence), R17, R24, H4, CR                                                           | YL313       | Table S2 |
| Mutant-3                                                         | NT, H1, R1, R16(Dys repeat 3'-linker consensus sequence), R17, R24, H4, CR                                              | YL314       | Table S2 |
| Mutant-4                                                         | NT, H1, R1, R16, R17(Utro R16 5'-linker sequence), R24, H4, CR                                                          | YL315       | Table S2 |
| <b>Repeat-modified microdystrophin</b>                           |                                                                                                                         |             |          |
| $\mu$ -Dys+Utro R15                                              | NT, H1, R1, Utro(R15), R17, R24, H4, CR                                                                                 | YL310       | Fig. S3  |
| $\mu$ -Dys+Utro R16                                              | NT, H1, R1, R16, Utro(R16), R24, H4, CR                                                                                 | YL311       | Fig. S3  |
| <b>Helix-deleted microdystrophin</b>                             |                                                                                                                         |             |          |
| $\Delta$ R16- $\alpha$ 1                                         | NT, H1, R1, R16( $\alpha$ 2, $\alpha$ 3), R17, R24, H4, CR                                                              | YL180       | Fig. 5A  |
| $\Delta$ R16- $\alpha$ 2                                         | NT, H1, R1, R16( $\alpha$ 1, $\alpha$ 3), R17, R24, H4, CR                                                              | YL181       | Fig. 5A  |
| $\Delta$ R16- $\alpha$ 3                                         | NT, H1, R1, R16( $\alpha$ 1, $\alpha$ 2), R17, R24, H4, CR                                                              | YL182       | Fig. 5A  |
| $\Delta$ R17- $\alpha$ 1                                         | NT, H1, R1, R16, R17( $\alpha$ 2, $\alpha$ 3), R24, H4, CR                                                              | YL183       | Fig. 5A  |
| $\Delta$ R17- $\alpha$ 2                                         | NT, H1, R1, R16, R17( $\alpha$ 1, $\alpha$ 3), R24, H4, CR                                                              | YL184       | Fig. 5A  |
| <b>Helix-substituted microdystrophin</b>                         |                                                                                                                         |             |          |
| R16 $\alpha$ 1#                                                  | NT, H1, R1, R18( $\alpha$ 1)+R16( $\alpha$ 2, $\alpha$ 3), R17, R24, H4, CR                                             | YL232       | Fig. 5B  |
| R16 $\alpha$ 2#                                                  | NT, H1, R1, R16( $\alpha$ 1)+R18( $\alpha$ 2)+R16( $\alpha$ 3), R17, R24, H4, CR                                        | YL233       | Fig. 5B  |
| R16 $\alpha$ 3#                                                  | NT, H1, R1, R16( $\alpha$ 1, $\alpha$ 2)+R18( $\alpha$ 3), R17, R24, H4, CR                                             | YL234       | Fig. 5B  |
| R17 $\alpha$ 2#                                                  | NT, H1, R1, R16, R17( $\alpha$ 1)+R18( $\alpha$ 2)+R17( $\alpha$ 3), R24, H4, CR                                        | YL236       | Fig. 5B  |
| R17 $\alpha$ 3#                                                  | NT, H1, R1, R16, R17( $\alpha$ 1, $\alpha$ 2)+R18( $\alpha$ 3), R24, H4, CR                                             | YL273       | Fig. 5B  |
| R16 $\alpha$ 1#+R17#                                             | NT, H1, R1, R2( $\alpha$ 1)+R16( $\alpha$ 2, $\alpha$ 3), R3, H2, R24, H4, CR                                           | YL270       | Table S2 |
| R16#+R17 $\alpha$ 3#                                             | NT, H1, R1, R2, R17( $\alpha$ 1, $\alpha$ 2)+R3( $\alpha$ 3), H2, R24, H4, CR                                           | YL271       | Table S2 |
| R16 $\alpha$ 1#+R17 $\alpha$ 3#                                  | NT, H1, R1, R2( $\alpha$ 1)+R16( $\alpha$ 2, $\alpha$ 3), R17( $\alpha$ 1, $\alpha$ 2)+R3( $\alpha$ 3), H2, R24, H4, CR | YL272       | Table S2 |
| R17 $\alpha$ 1#                                                  | NT, H1, R1, R16, R18( $\alpha$ 1)+R17( $\alpha$ 2, $\alpha$ 3), R24, H4, CR                                             | YL235       | Table S2 |
| R16 $\alpha$ 2 with R4 $\alpha$ 2                                | NT, H1, R1, R16( $\alpha$ 1)+R4( $\alpha$ 2)+R16( $\alpha$ 3), R17, R24, H4, CR                                         | YL382       | Table S2 |
| R16 $\alpha$ 3 with R4 $\alpha$ 3                                | NT, H1, R1, R16( $\alpha$ 1, $\alpha$ 2)+R4( $\alpha$ 3), R17, R24, H4, CR                                              | YL383       | Table S2 |
| R17 $\alpha$ 2 with R5 $\alpha$ 2                                | NT, H1, R1, R16, R17( $\alpha$ 1)+R5( $\alpha$ 2)+R17( $\alpha$ 3), R24, H4, CR                                         | YL384       | Table S2 |
| R17 $\alpha$ 3 with R5 $\alpha$ 3                                | NT, H1, R1, R16, R17( $\alpha$ 1, $\alpha$ 2)+R5( $\alpha$ 3), R24, H4, CR                                              | YL385       | Table S2 |

Constructs are listed in the order as they appear in the manuscript. CR, cystein-rich domain; H, hinge; NT, N-terminal domain; Pal, palmitoylation membrane targeting sequence; R, spectrin-like repeat; Utro, utrophin.
